# Supplementary material for: Increased growth ability and pathogenicity of American- and Pacific-subtype Zika virus (ZIKV) strains compared with a Southeast Asian-subtype ZIKV strain
Source: PLoS Negl Trop Dis. 2019 Jun 6;13(6):e0007387. doi: 10.1371/journal.pntd.0007387 (PMC6553702; doi:10.1371/journal.pntd.0007387)
Supplement: S1 Table — (XLSX) [file pntd.0007387.s001.xlsx]

## Sheet: Sheet1
S1 Table. List of ZIKV strains used for phylogenetic analysis and comparison of amino acid sequences
Strain name	Accession no.	Year identified	Sourse	Lineage	Country (region)
Micronesia2007	EU545988	2007	Human	Asian/American	Micronesia
FSS13025	JN860885	2010	Human		Cambodia
PHL/2012/CPC-0740	KU681082	2012	Human		Philippines
1_0049_PF	KX447510	2013	Human		French Polynesia
1_0181_PF	KX447512	2013	Human		French Polynesia
PLCal_ZV	KF993678	2013	Human		Thailand
H/PF/2013	KJ776791	2013	Human		French Polynesia
1_0030_PF	KX447515	2014	Human		French Polynesia
1_0038_PF	KX447517	2014	Human		French Polynesia
THA/2014/SV0127- 14	KU681081	2014	Human		Thailand
8375	KU501217	2015	Human		Guatemala
PRVABC59	KU501215	2015	Human		Puerto Rico
ZikaSPH2015	KU321639	2015	Human		Brazil
Paraiba_01	KX280026	2015	Human		Brazil
Bahia09	KU940224	2015	Human		Brazil
BeH819015	KU365778	2015	Human		Brazil
Natal RGN	KU527068	2015	Human		Brazil
FLR	KU820897	2015	Human		Colombia
PAN/CDC-259359	KX156774	2015	Human		Panama
ZIKV/Hu/Yokohama/1/2016	LC190725	2016	Human		Dominican Rep.
MEX_I-7/2016	KX446951	2016	Mosquito (Aedes sp.)		Mexico
Zika virus/SZ01/2016/China	KU866423	2016	Human		American Samoa
TS17-2016	KX806557	2016	Human		Tonga
ZIKV/Hu/Chiba/S36/2016	LC191864	2016	Human		Fiji
ZIKV/Hu/NIID123/2016	LC219720	2016	Human		Vietnam
ZKA-16-291	KX827309	2016	Human		Singapore
GDZ16001	KU761564	2016	Human		Venezuela
MEX/InDRE/Lm/2016	KU922923	2016	Human		Mexico
Dominican republic/2016/PD2	KU853013	2016	Human		Dominican Rep.
ZJ03	KU820899	2016	Human		Fiji, Samoa
ZIKV-SG-050	KY241720	2016	Human		Singapore
ZIKV-SG-118	KY241788	2016	Human		Singapore
SI-BKK01	KY272987	2016	Human		Thailand
MR766-NIID	LC002520	1947	Rhesus monkey	African	Uganda
ArD7117	KF383116	1968	Mosquito (Aedes sp.)		Senegal
ArB1362	KF383115	1968	Mosquito (Aedes sp.)		Central African Republic
ARB13565	KF268948	1976	Mosquito (Aedes sp.)		Central African Republic
ArD157995	KF383118	2001	Mosquito (Aedes sp.)		Senegal
ArD158084	KF383119	2001	Mosquito (Aedes sp.)		Senegal
